# Supplementary material for: NAT10, an RNA Cytidine Acetyltransferase, Regulates Ferroptosis in Cancer Cells
Source: MDPI journal article supplement (doi:10.3390/antiox12051116), 2023-05-18
Supplement: s1 [file s1]

## Supplementary figures

### NAT10, an RNA cytidine acetyltransferase regulates ferroptosis in cancer cells

Mahmood Hassan Dalhat<sup>1,2</sup>, Hani Choudhry<sup>1,2</sup>, Mohammad Imran Khan<sup>1,2\*</sup>

<sup>1</sup> Department of Biochemistry, King Abdulaziz University, Jeddah 21589, Saudi Arabia

<sup>2</sup> Centre for Artificial Intelligence in Precision Medicines, King Abdulaziz University, Jeddah 21589, Saudi Arabia

\*Correspondence: [mikhan@kau.edu.sa](mailto:mikhan@kau.edu.sa)

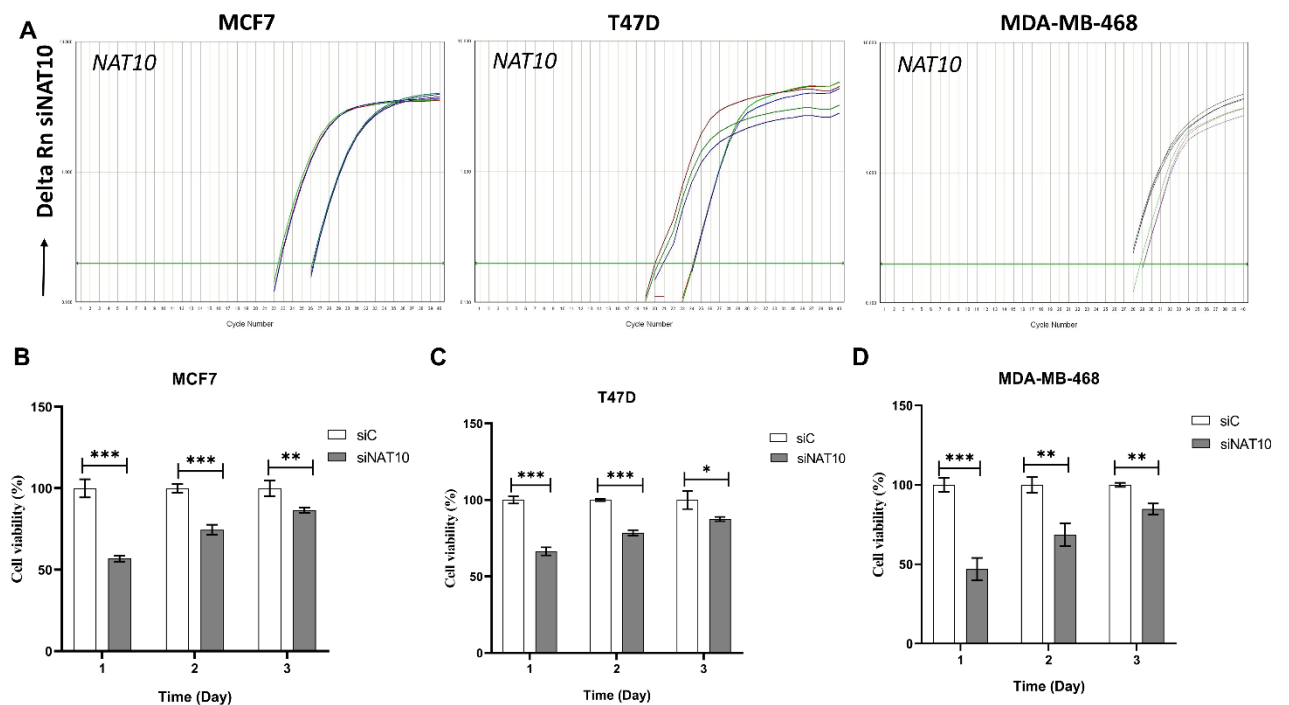

**Figure S1.** (A) Amplification plot of breast cancer cells transfected with siRNA. Cell viability analysis of NAT10 depleted cancer cells (B) MCF (C) T47D (D) MDA-MB-468. Data are represented as mean $\pm$ SEM (n=3) and p-value is represented as \*p<0.05; \*\*p<0.01; and \*\*\*p<0.001.

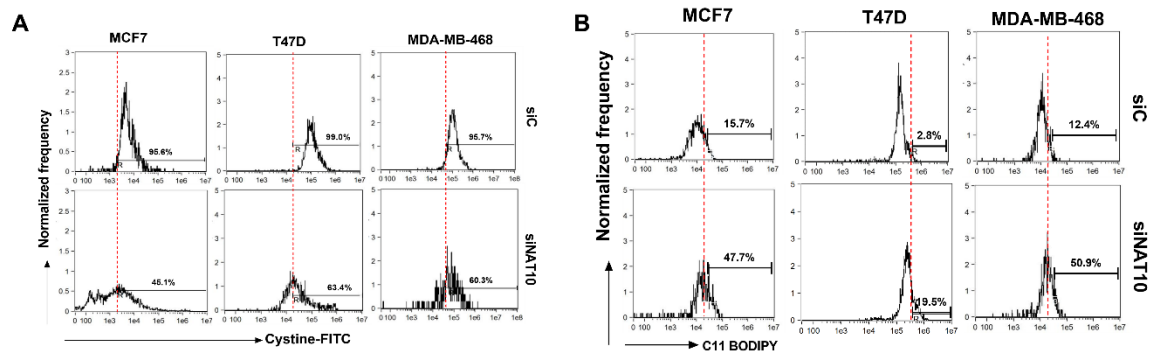

**Figure S2.** Representative histograms from flow cytometric analysis of (A) Cystine uptake (Cystine-FITC), (B) Lipid peroxidation (C11-BODIPY) in NAT10 depleted cancer cells.

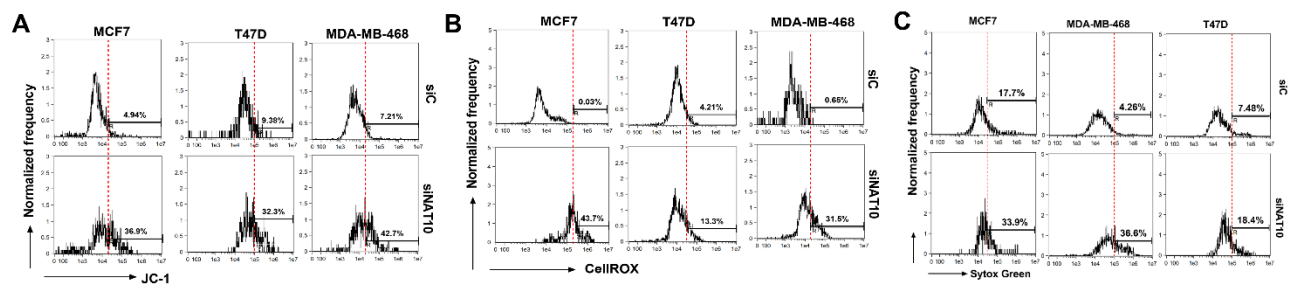

**Figure S3.** Representative histograms from flow cytometric analysis of (A-C) mitochondrial membrane potential, cell ROS and cell death assay of NAT10 depleted cancer cells.

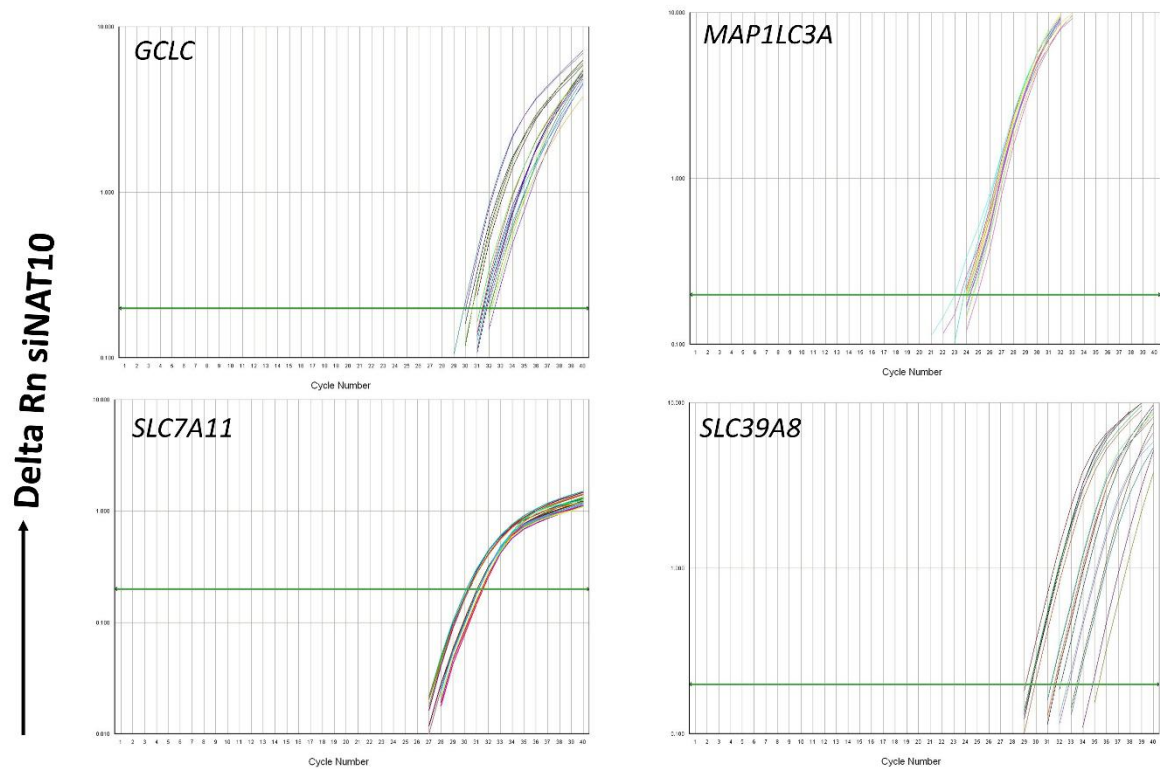

**Figure S4.** Amplification plot from RIP-PCR of ferroptosis genes in NAT10 depleted cancer cells.

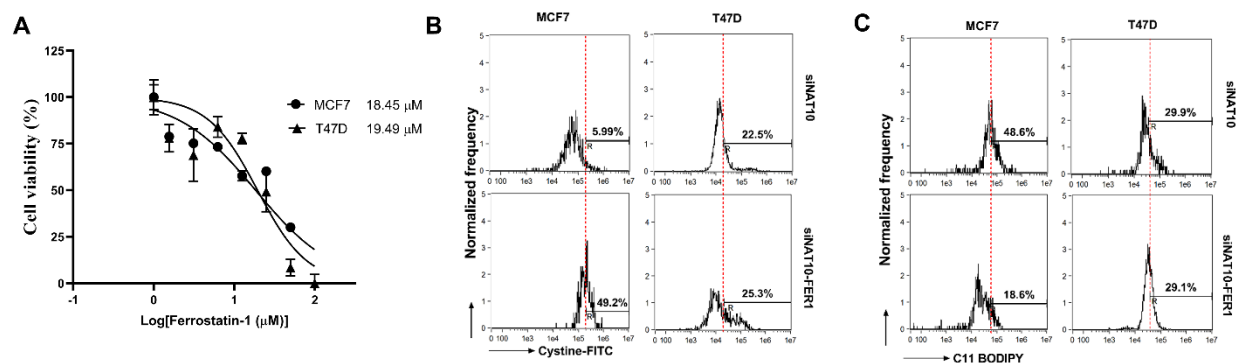

**Figure S5.** Impact of ferrostatin-1 on NAT10 depleted cancer cells. (A) Cell viability assay of ferrostatin (fer-1) treated cancer cells after 24 h. (B, C) Representative histograms from flow cytometric analysis of cystine uptake and lipid peroxidation of NAT10 depleted cancer cells followed by 24 h treatment with fer-1.

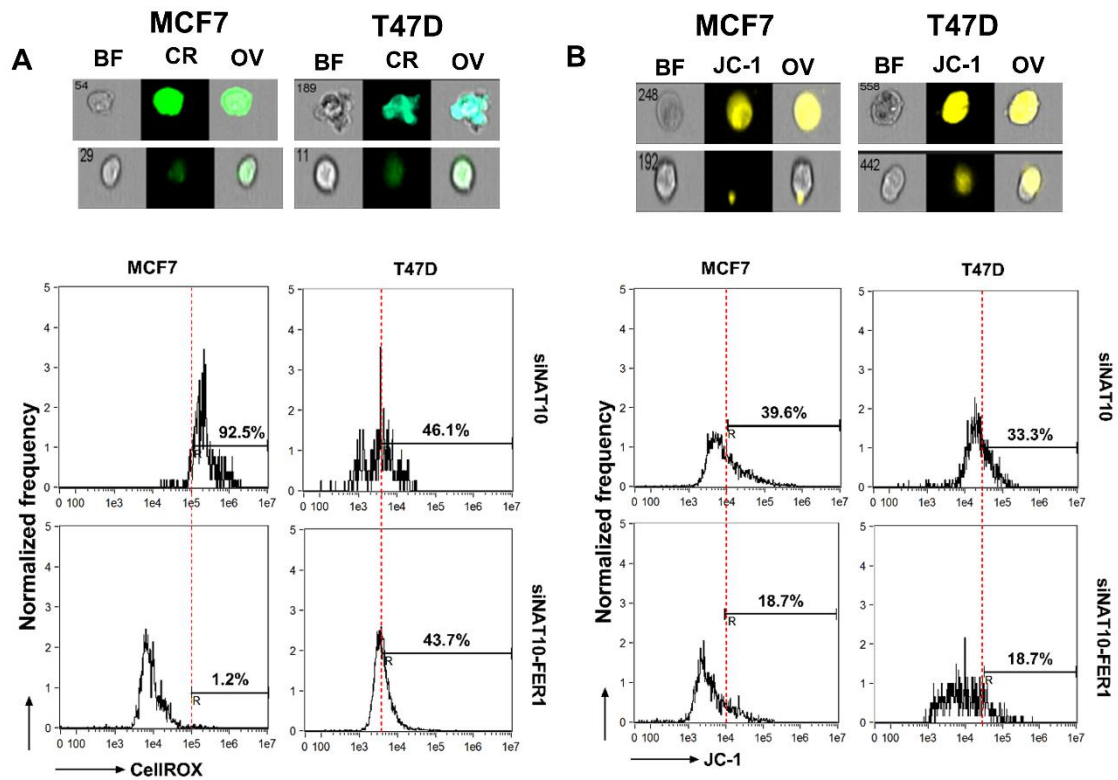

**Figure S6.** Flow cytometric analysis of (A) Cell ROS and (B) Mitochondrial membrane potential, in NAT10 depleted cancer cells treated with ferostatin-1 (fer-1). BF: Brightfield, CR: CellROX; JC-1; JC-1 stain of cell with depolarized mitochondria, OV: Overlay.

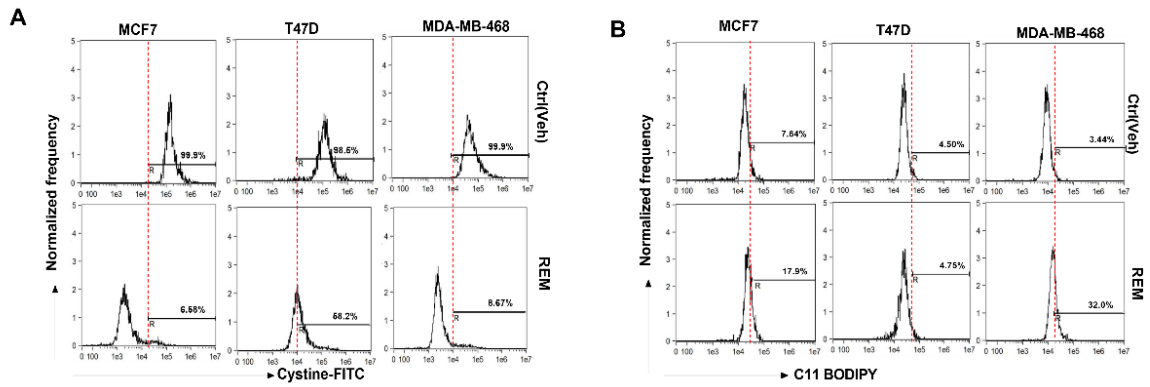

**Figure S7.** Representative histograms from flow cytometric analysis of (A) Cystine uptake (Cystine-FITC), (B) Lipid peroxidation (C11-BODIPY) in cancer cells 24 h posttreated with Remodelin.

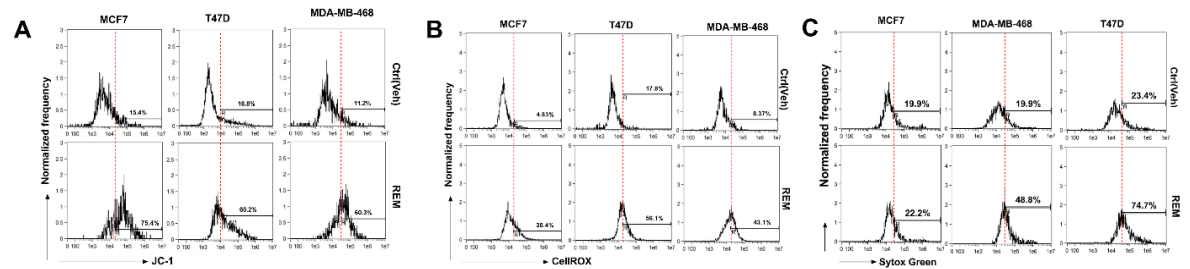

**Figure S8.** Representative histograms from flow cytometric analysis of (A-C) mitochondrial membrane potential, cell ROS and cell death assay of Remodelin treated cancer cells after 24 h.

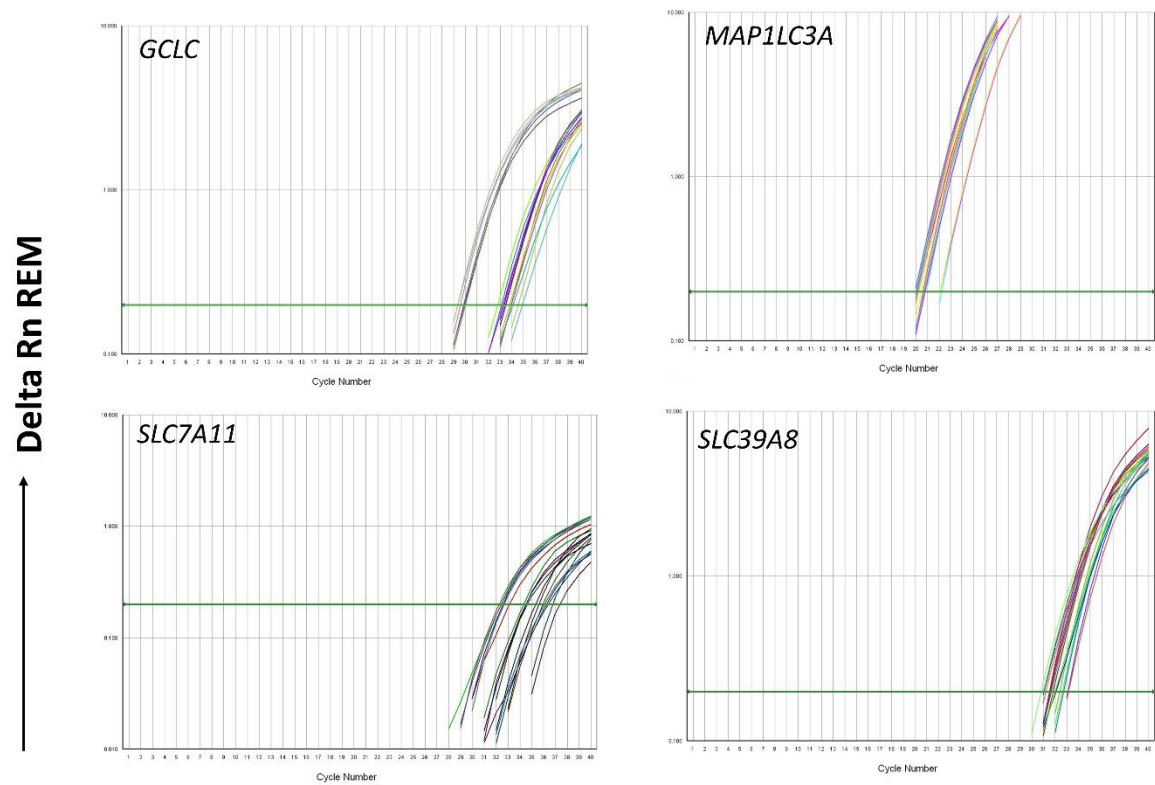

**Figure S9.** Amplification plot from RIP-PCR of ferroptosis genes in Remodelin treated cancer cells.

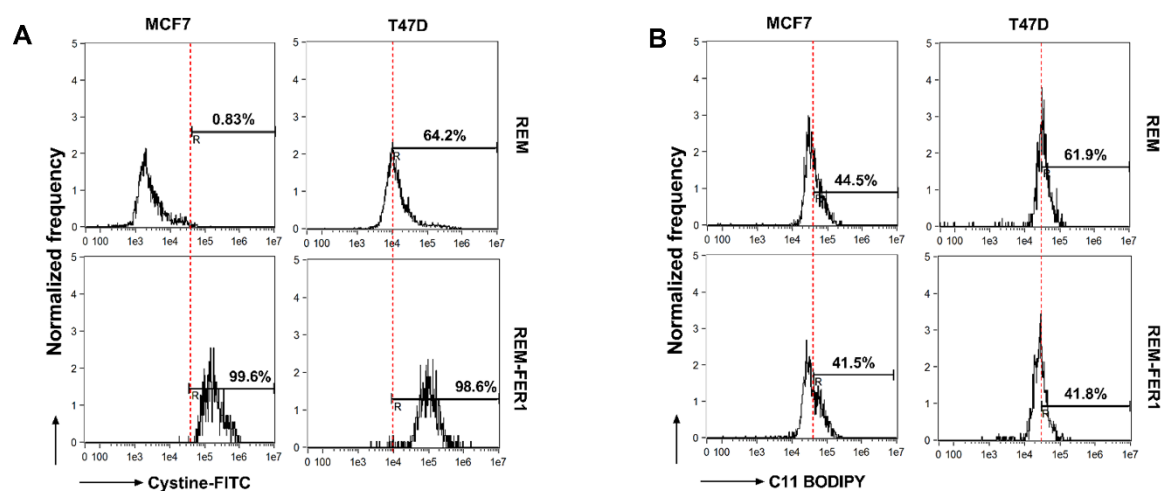

**Figure S9.** (A, B) Representative histograms from flow cytometric analysis of cystine uptake and lipid peroxidation of 24 h Remodelin treated cancer cells subsequently followed by 24 h treatment with fer-1.

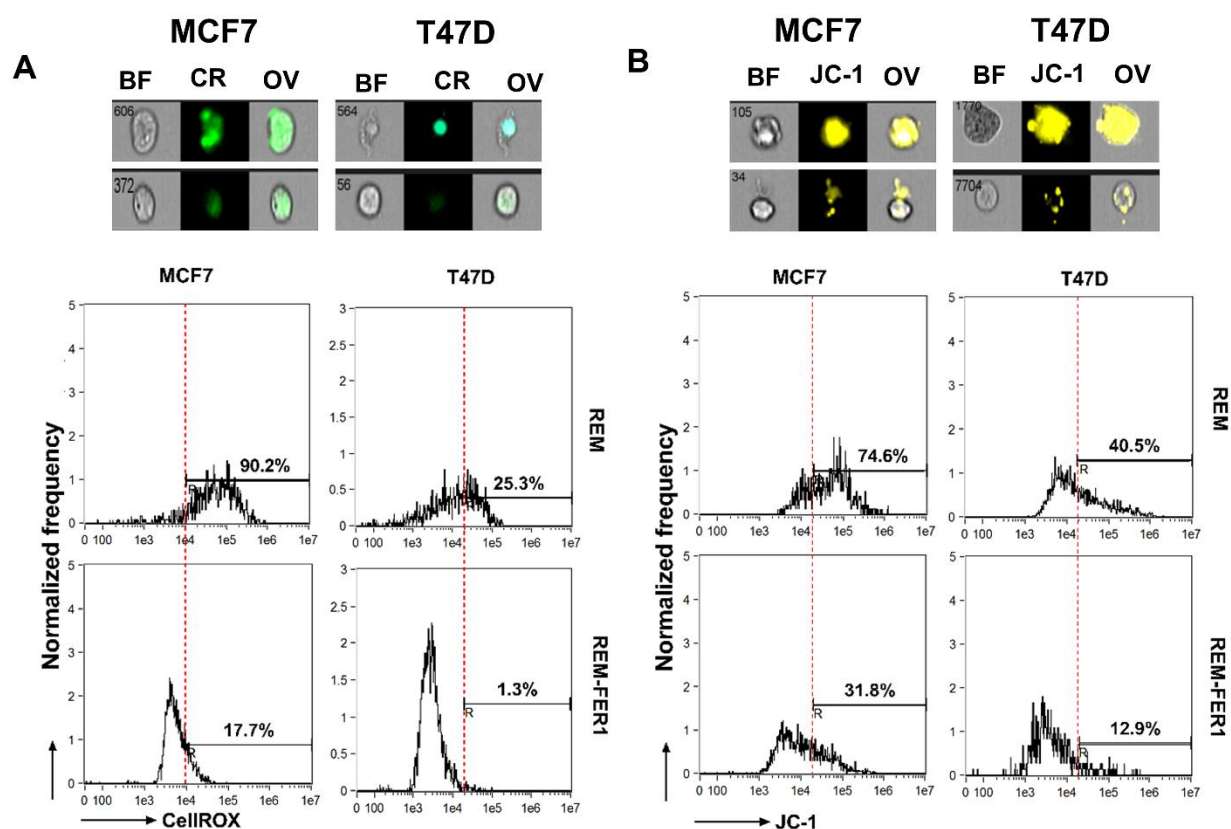

**Figure S11.** Flow cytometric analysis of (A) Cell ROS and (B) Mitochondrial membrane potential, in Remodelin treated cancer cells treated with fer-1. BF: Brightfield, CR: CellROX; JC-1; JC-1 stain of cell with depolarized mitochondria, OV: Overlay.
