# Supplementary material for: NAT10, an RNA Cytidine Acetyltransferase, Regulates Ferroptosis in Cancer Cells
Source: MDPI journal article supplement (doi:10.3390/antiox12051116), 2023-05-18
Supplement: s1 [file s1]

**Table S1: Joint pathway analysis of metabolomics and transcriptomics of NAT10 depleted MCF7**

| S/<br>N | Pathways                         | Total | Expected | Hits | Raw p    | -Log10<br>pvalue | Holm<br>adjust | FDR      | Impact   |
|---------|----------------------------------|-------|----------|------|----------|------------------|----------------|----------|----------|
| 1       | Adherens junction                | 71    | 2.0897   | 10   | 3.99E-05 | 4.3986           | 0.01322        | 0.011803 | 0.30667  |
| 2       | Cell cycle                       | 124   | 3.6496   | 13   | 7.13E-05 | 4.1468           | 0.023534       | 0.011803 | 0.57273  |
| 3       | Cellular senescence              | 165   | 4.8564   | 14   | 0.000365 | 3.4379           | 0.12003        | 0.030615 | 0.31624  |
| 4       | Proteoglycans in cancer          | 211   | 6.2103   | 16   | 0.000504 | 3.2974           | 0.16538        | 0.030615 | 0.21     |
| 5       | Hippo signaling pathway          | 154   | 4.5326   | 13   | 0.000617 | 3.2099           | 0.20165        | 0.030615 | 0.33333  |
| 6       | Ubiquitin mediated proteolysis   | 136   | 4.0028   | 12   | 0.000669 | 3.1746           | 0.21808        | 0.030615 | 0        |
| 7       | cGMP-PKG signaling pathway       | 177   | 5.2096   | 14   | 0.000739 | 3.1314           | 0.24017        | 0.030615 | 0.29268  |
| 8       | mTOR signaling pathway           | 157   | 4.6209   | 13   | 0.00074  | 3.1308           | 0.24017        | 0.030615 | 0.39286  |
| 9       | Ferroptosis                      | 71    | 2.0897   | 8    | 0.001096 | 2.9601           | 0.3541         | 0.038565 | 0.081081 |
| 10      | Insulin resistance               | 128   | 3.7674   | 11   | 0.001378 | 2.8606           | 0.44385        | 0.038565 | 0.27941  |
| 11      | RNA transport                    | 168   | 4.9447   | 13   | 0.001384 | 2.8589           | 0.44419        | 0.038565 | 0.23853  |
| 12      | mRNA surveillance pathway        | 91    | 2.6784   | 9    | 0.001398 | 2.8545           | 0.4474         | 0.038565 | 0.23214  |
| 13      | Human papillomavirus infection   | 333   | 9.801    | 20   | 0.002017 | 2.6953           | 0.64334        | 0.05135  | 0.21875  |
| 14      | FoxO signaling pathway           | 136   | 4.0028   | 11   | 0.002241 | 2.6496           | 0.71263        | 0.052983 | 0.21429  |
| 15      | Focal adhesion                   | 201   | 5.9159   | 14   | 0.002486 | 2.6045           | 0.78811        | 0.053213 | 0.62903  |
| 16      | PPAR signaling pathway           | 81    | 2.384    | 8    | 0.002572 | 2.5897           | 0.81282        | 0.053213 | 0.27119  |
| 17      | Herpes simplex virus 1 infection | 494   | 14.54    | 26   | 0.002975 | 2.5265           | 0.93716        | 0.057754 | 0.090909 |
| 18      | Hepatitis B                      | 163   | 4.7975   | 12   | 0.003162 | 2.5              | 0.99295        | 0.057754 | 0.15217  |
| 19      | Dopaminergic synapse             | 143   | 4.2088   | 11   | 0.003315 | 2.4795           | 1              | 0.057754 | 0.31944  |
| 20      | Endocytosis                      | 255   | 7.5053   | 16   | 0.003613 | 2.4422           | 1              | 0.059788 | 0.051095 |
